# Supplementary material
Source: PubMed Central journal article supplement (PMC5823763)

**Plasma omega-3 and omega-6 fatty acid-related risk of carotid plaque progression over a 10 year follow up period**

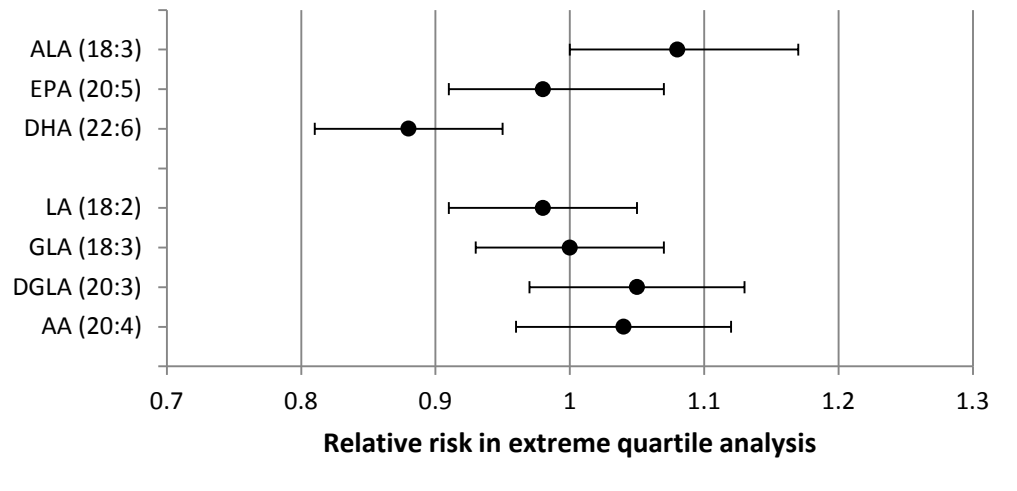

Supplement: NIHMS931807-supplement-Graphic_Abstract.pdf [file NIHMS931807-supplement-Graphic_Abstract.pdf]
