# Supplementary material
Source: PubMed Central journal article supplement (PMC5823763)
Supplement: NIHMS931807-supplement-Supplement.pdf [file NIHMS931807-supplement-Supplement.pdf]

## Supplemental Material

Supplemental Table I. Secondary analyses of plasma omega-3 and -6 variables with carotid plaque outcomes were conducted in MESA participants. First quartiles serve as referents. Adjustments were made for age, sex, race/ethnicity, BMI, hypertension medication use, smoking status, systolic blood pressure, diabetes, lipid lowering medication use (as a time dependent variable), HDL-C, and total cholesterol. Values are expressed as relative risk (95% confidence intervals). Carotid plaque outcomes were treated as logistical variables (0 or 1).

|                                            |     | Fatty acid variable quartile |                       |                       |                                      |
|--------------------------------------------|-----|------------------------------|-----------------------|-----------------------|--------------------------------------|
|                                            |     | 1                            | 2                     | 3                     | 4                                    |
| <b>Baseline carotid plaque (n=3327)</b>    |     |                              |                       |                       |                                      |
| EPA + DHA                                  | Ref |                              | 0.97<br>(0.89 - 1.06) | 0.95<br>(0.87 - 1.05) | 0.93<br>(0.85 - 1.02)                |
| Total n-3 FAs                              | Ref |                              | 0.97<br>(0.89 - 1.06) | 0.96<br>(0.88 - 1.05) | 0.92<br>(0.84 - 1.01)                |
| N3/N6 ratio                                | Ref |                              | 0.94<br>(0.86 - 1.02) | 0.96<br>(0.87 - 1.05) | <b>0.90</b><br><b>(0.82 - 0.99)*</b> |
| Total n-6 FAs                              | Ref |                              | 1.03<br>(0.92 - 1.16) | 1.05<br>(0.94 - 1.18) | 1.05<br>(0.93 - 1.18)                |
| <b>Carotid plaque progression (n=3296)</b> |     |                              |                       |                       |                                      |
| EPA + DHA                                  | Ref |                              | 0.94<br>(0.88 - 1.02) | 0.93<br>(0.86 - 1.01) | <b>0.90</b><br><b>(0.83 - 0.98)†</b> |
| Total n-3 FAs                              | Ref |                              | 0.96<br>(0.89 - 1.03) | 0.95<br>(0.88 - 1.03) | <b>0.90</b><br><b>(0.83 - 0.98)†</b> |
| N3/N6 ratio                                | Ref |                              | 0.97<br>(0.90 - 1.05) | 0.98<br>(0.91 - 1.07) | 0.93<br>(0.86 - 1.01)                |
| Total n-6 FAs                              | Ref |                              | 1.00<br>(0.93 - 1.08) | 1.01<br>(0.93 - 1.09) | 1.01<br>(0.94 - 1.10)                |

\*p<0.05

†<0.02
